# Supplementary material
Source: publisher figshare collection journal article supplement (https://sage.figshare.com/ndownloader/files/16587593)
Supplement: Supplementary file 1 [file 16587593]

## Supplementary materials

**a**

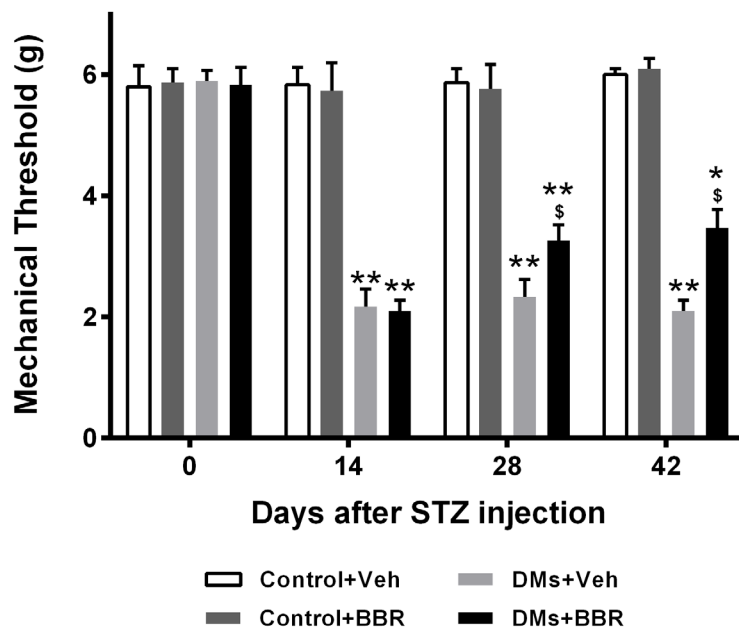

**b**

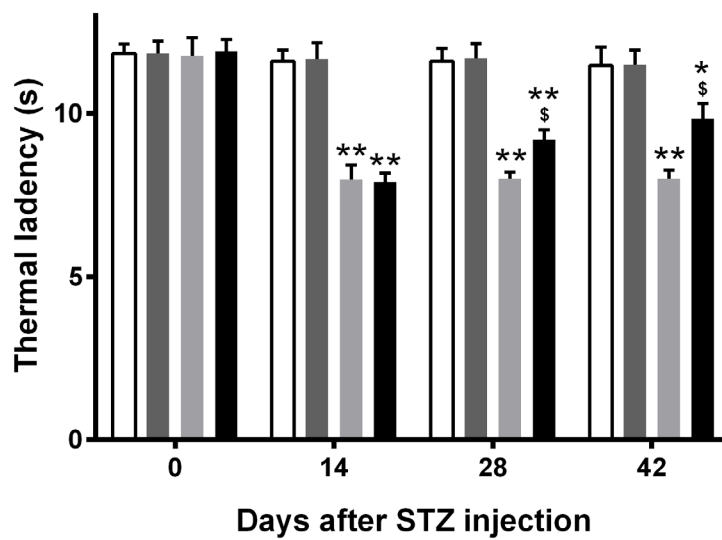

Figure S1. Anti-nociceptive effects of berberine to DMs, starting 2 weeks after STZ injection, on mechanical threshold (a) and thermal latency (b). Data are presented as mean  $\pm$  SEM.  $n=13$  for each group. \*  $p < 0.05$ , \*\*  $p < 0.01$  compared to control group. \$  $p < 0.05$  compared to DMs group.
